# Supplementary material for: S-nitrosylated and non-nitrosylated COX2 have differential expression and distinct subcellular localization in normal and breast cancer tissue
Source: PubMed Central journal article supplement (PMC7686348; doi:10.1038/s41523-020-00204-6), 2020-11-24
Supplement: 41523_2020_204_MOESM1_ESM.pdf [file 41523_2020_204_MOESM1_ESM.pdf]

**Supplementary Table 1:** COX-2 expression in Breast TMA comparing COX2 clones CX229 and CX294

| <b>TMA Staining Results</b> | <b>COX-2 Clones</b> | <b>COX-2 Positive Breast TMA (n=56)</b> |
|-----------------------------|---------------------|-----------------------------------------|
| Dual Positive COX-2         | CX229+/CX294+       | 53 (95%)                                |
| Positive for CX229 only     | CX229+/CX294-       | 0                                       |
| Positive for CX294 only     | CX229-/ CX294+      | 0                                       |
| Dual negative COX-2         | CX229-/ CX294 -     | 3 (5%)                                  |

**Supplementary Table 2:** COX-2 expression in Breast and Colon TMA comparing clones SP21 and CX229

| <b>TMA Staining Results</b> | <b>COX-2 Clones</b> | <b>COX-2 Positive Breast TMA (n=52)</b> | <b>COX-2 Positive Colon TMA (n=53)</b> |
|-----------------------------|---------------------|-----------------------------------------|----------------------------------------|
| Non-nitrosylated COX-2 only | CX229+/SP21-        | 18 (35%)                                | 23 (43%)                               |
| Dual positive COX-2         | CX229+/SP21+        | 29 (55%)                                | 21 (40%)                               |
| S-nitrosylated COX-2 only   | CX229-/SP21+        | 1 (2%)                                  | 0 (0%)                                 |
| Dual negative COX-2         | CX229-/SP21-        | 4 (8%)                                  | 9 (17%)                                |

**Supplementary Table 3: Clinical characteristics of NHS 1 and YWBC cohorts**

| <b>Clinical characteristics</b> | <b>Nurses' Health Study 1</b> | <b>Young Women Breast Cancer</b> | <b>P value (chi square test)</b> |
|---------------------------------|-------------------------------|----------------------------------|----------------------------------|
| <b>Overall N</b>                | 1770 cases                    | 233 cases                        |                                  |
| <b>Age at dx, mean</b>          | 57.8                          | 38.24                            |                                  |
| <b>Stage</b>                    |                               |                                  |                                  |
| 1                               | 885 (50%)                     | 67 (28.7%)                       | <0.0001                          |
| 2                               | 600 (33.9%)                   | 97 (41.6%)                       |                                  |
| 3                               | 250 (14.1%)                   | 52 (22.3%)                       |                                  |
| 4                               | 35 (2%)                       | 15 (6.52%)                       |                                  |
| <b>Grade</b>                    |                               |                                  |                                  |
| 1                               | 303 (17.1%)                   | 22 (9.4%)                        | <0.0001                          |
| 2                               | 935 (52.8%)                   | 86 (36.9%)                       |                                  |
| 3                               | 416 (23.5%)                   | 109 (46.8%)                      |                                  |
| Missing                         | 116 (6.6%)                    | 16 (6.9%)                        |                                  |
| <b>Tumor size (cm)</b>          |                               |                                  |                                  |
| ≤1                              | 439 (24.6%)                   | 30 (12.9%)                       | <0.0001                          |
| 1.1-2.0                         | 682 (38.3%)                   | 73 (31.4%)                       |                                  |
| 2.1-4.0                         | 481 (27.1%)                   | 65 (27.9%)                       |                                  |
| >4.0                            | 164 (9.8%)                    | 53 (22.7%)                       |                                  |
| Missing                         | 4 (0.2%)                      | 12 (5.1%)                        |                                  |
| <b>ER status</b>                |                               |                                  |                                  |
| Positive                        | 1361 (76.9%)                  | 142 (60.9%)                      | <0.0001                          |
| Negative                        | 404 (22.8%)                   | 87 (37.3%)                       |                                  |
| Missing                         | 5 (0.3%)                      | 4 (1.8%)                         |                                  |
| <b>PR status</b>                |                               |                                  |                                  |
| Positive                        | 1137 (64.2%)                  | 135 (57.9%)                      | 0.1156                           |
| Negative                        | 625 (35.3%)                   | 93 (39.9%)                       |                                  |
| Missing                         | 8 (0.5%)                      | 5 (2.1%)                         |                                  |
| <b>HER2 status</b>              |                               |                                  |                                  |
| Positive                        | 195 (11.0%)                   | 67 (28.7%)                       | <0.0001                          |
| Negative                        | 1546 (87.4%)                  | 147 (63%)                        |                                  |
| Missing                         | 29 (1.6%)                     | 19 (8.3%)                        |                                  |
| <b>Hormone therapy</b>          |                               |                                  |                                  |
| Yes                             | 837 (47.4%)                   | 79 (33.9%)                       | 0.0047                           |
| No                              | 433 (24.6%)                   | 67 (28.8%)                       |                                  |
| Missing                         | 496 (28%)                     | 87 (37.3%)                       |                                  |
| <b>Radiation</b>                |                               |                                  |                                  |
| Yes                             | 545 (30.7%)                   | 90 (38.6%)                       | <0.0001                          |
| No                              | 735 (41.5%)                   | 55 (43.5%)                       |                                  |
| Missing                         | 490 (27.8%)                   | 88 (37.8%)                       |                                  |
| <b>Chemotherapy</b>             |                               |                                  |                                  |
| Yes                             | 492 (27.8%)                   | 137 (58.9%)                      | <0.0001                          |
| No                              | 772 (43.6%)                   | 19 (8.1%)                        |                                  |
| Missing                         | 506 (28.6%)                   | 77 (33%)                         |                                  |

**Supplementary Table 4:** The methodological details for IHC and IF staining

| <b>Stain/single or dual</b>           | <b>Antigen retrieval</b>                               | <b>Peroxidase and Protein Blocks</b>                                                                                                                                                                                                       | <b>Primary Antibody</b>                                   | <b>Secondary Antibody</b>                                 | <b>Chromogen</b>               |
|---------------------------------------|--------------------------------------------------------|--------------------------------------------------------------------------------------------------------------------------------------------------------------------------------------------------------------------------------------------|-----------------------------------------------------------|-----------------------------------------------------------|--------------------------------|
| <b>IHC – SP21 stain</b>               | 125°C under pressure for 5 mins with TRS (Dako #S1699) | Peroxidase block (1ml 3% H <sub>2</sub> O <sub>2</sub> + 9 ml methanol) for 10 mins<br>Protein block (Biocare # BS966L) for 10 mins                                                                                                        | SP21 clone (Thermoscientific # RM-9121) 1:200 for 60 mins | Envision + HRP antibody (Dako # K4003 rabbit) for 30 mins | DAB (Dako # K3468) for 10 mins |
| <b>IHC- CX229 stain</b>               | 125°C under pressure for 5 mins with TRS (Dako #S1699) | Peroxidase block (1ml 3% H <sub>2</sub> O <sub>2</sub> + 9 ml methanol) for 10 mins<br>Protein block (Biocare # BS966L) for 10 mins                                                                                                        | CX229 clone (Cayman, # 160112) 1:250 for 60 mins          | Envision + HRP antibody (Dako # K4001 mouse) for 30 mins  | DAB (Dako # K3468) for 10 mins |
| <b>IHC- CX294 stain</b>               | 125°C under pressure for 5 mins with TRS (Dako #S1699) | Peroxidase block (1ml 3% H <sub>2</sub> O <sub>2</sub> + 9 ml methanol) for 10 mins<br>Protein block (Biocare # BS966L) for 10 mins                                                                                                        | CX294 clone (Agilent # M3617) 1:50 for 60 mins            | Envision + HRP antibody (Dako # K4001 mouse) for 30 mins  | DAB (Dako # K3468) for 10 mins |
| <b>IHC- Dual SP21 and CX229 stain</b> | 125°C under pressure for 5 mins with TRS (Dako #S1699) | <i>1st antibody stain:</i><br>Peroxidase (1ml 3% H <sub>2</sub> O <sub>2</sub> + 9 ml methanol) for 10 mins<br><br>Protein block (Biocare # BS966L) for 10 mins<br><i>2nd antibody stain:</i> Protein block (Biocare # BS966L) for 10 mins | CX229 clone (Cayman, #160112) 1:250for 60 mins            | Envision + HRP antibody (Dako # K4001mouse) for 30 mins   | DAB (Dako # K3468) for 10 mins |
|                                       |                                                        |                                                                                                                                                                                                                                            |                                                           |                                                           |                                |

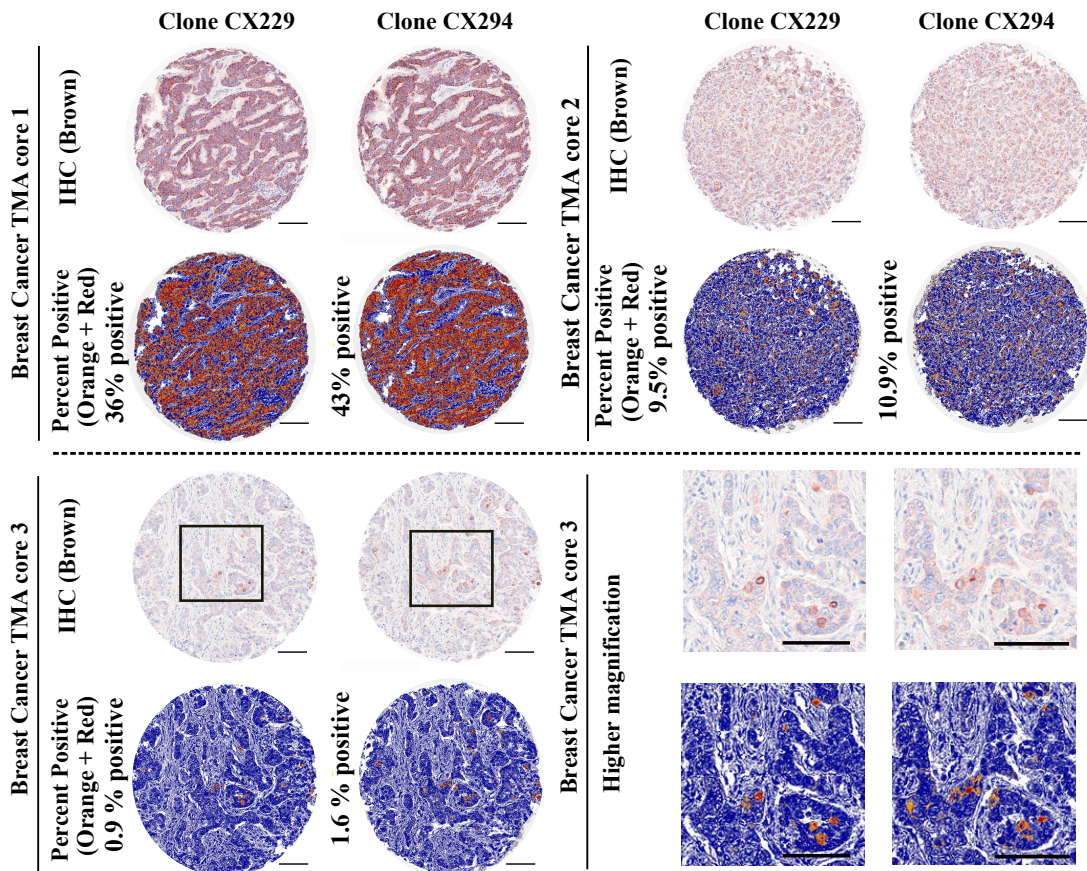

**Supplementary Figure 1:** TMA cores from breast cancer cases stained for CX229 and CX294 have similar staining intensity, ranging from high (core #1), medium (core #2) or low (core #3). Higher magnification of core #3 (black box) shows that CX229 and CX294 have similar specificity in staining the same cells on sequential sections. Algorithmic analysis for each TMA core shows COX2 positive signal (orange and red) compared to negatively stained tissue (blue). Scale bar for all images is 100 $\mu$ m.

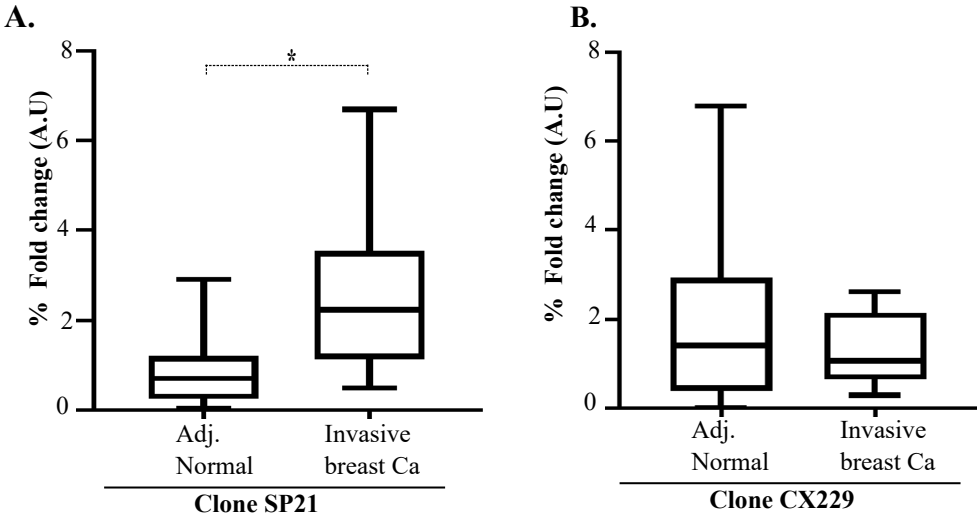

**Supplementary Figure 2.** SP21 and CX229 clones show inverted staining patterns between adjacent normal and invasive cancer in Kaiser Pacific North West (KPNW) cases. A. SP21 staining intensity was low in adjacent normal breast tissue and increased in invasive breast cancer (n = 10, P value:  $*\leq 0.05$ ). B. CX229 (n = 10) shows highest COX2 expression in normal adjacent breast epithelium with a trend towards decreased COX2 expression in invasive breast cancer.

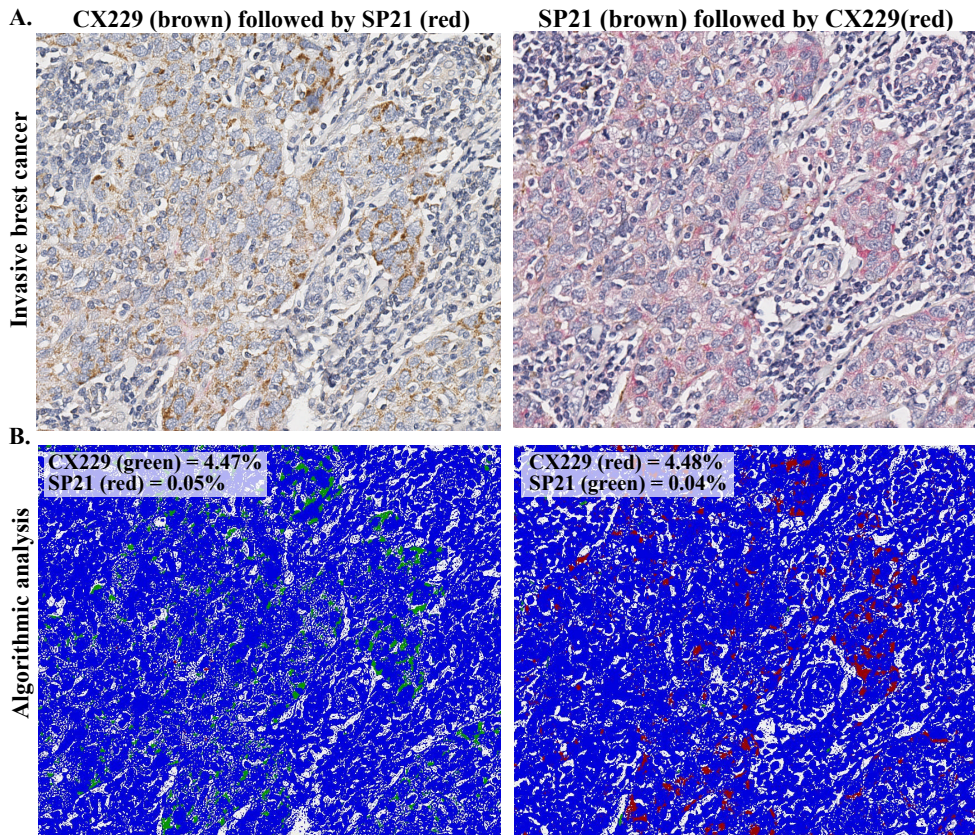

**Supplementary Figure 3.** A. Dual IHC stained images of SP21 and CX229 show similar staining patterns when the order of antibodies and chromogens were switched during staining process. B. Algorithmic analysis of the images in part A of this figure (upper panel) revealed 4.47% CX229 (green) and 0.05% SP21 (red) expression (left, lower panel). With reversed antibody order, there was 4.48% CX229 (red) and 0.04% SP21 (green) expression (right, lower panel).

IF staining for SP21 (red) CX294 (green)    IF staining for SP21 (red) CX229 (green)

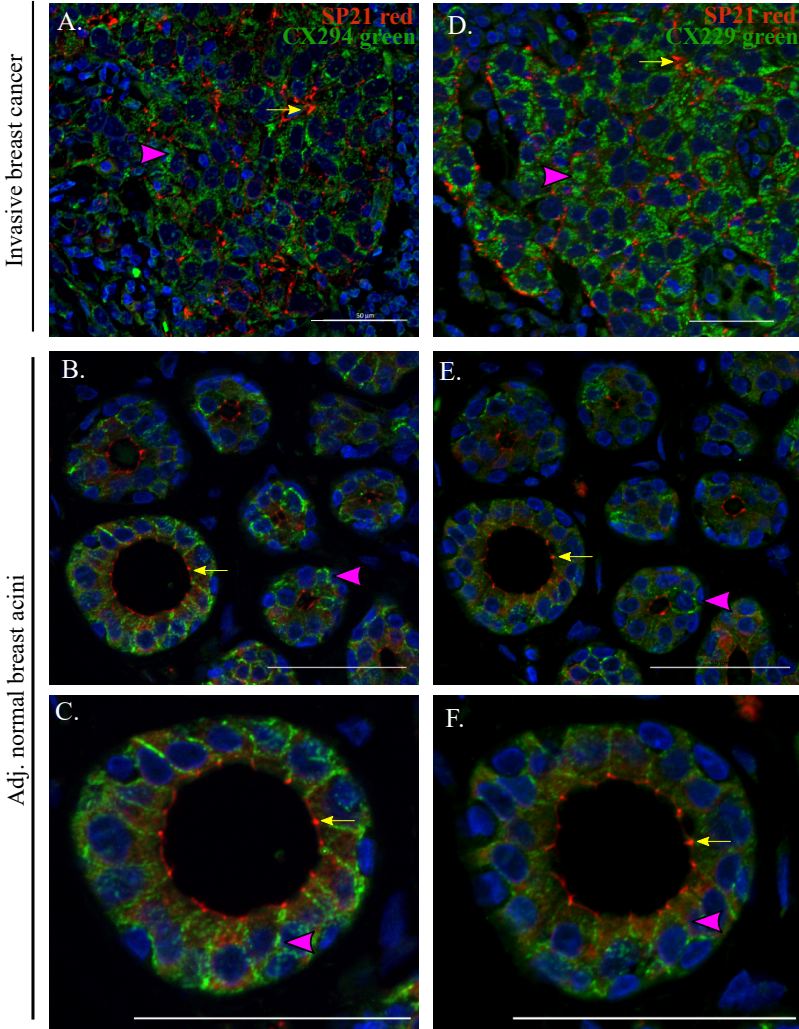

**Supplementary Figure 4.** IF staining of serial sections of an invasive cancer case and adjacent normal breast acini show distinct sub-cellular localization of SP21, CX294 and CX229. The left column shows dual stains of SP21 and CX294 with minimal co-localization (SP21 = red, CX294 = green, co-localization = yellow). The right column shows dual stains of SP21 and CX229 with minimal co-localization (SP21 = red, CX229 = green, co-localization = yellow). Pink arrow heads show intense localized staining for CX294/CX229. Yellow arrows show intense localized staining for SP21. Scale bar for all images is 50 $\mu$ m.



Normal breast lobule

IF dual staining (SP21 red; CX229 green)

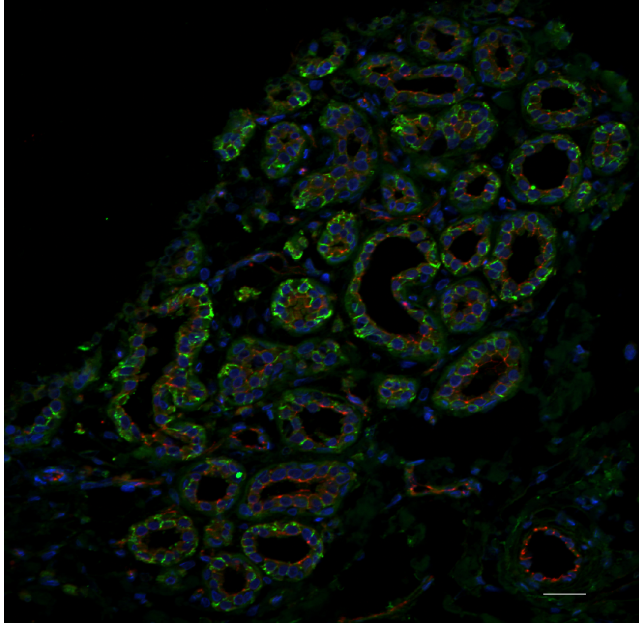

**Supplementary Figure 5.** IF staining of a true normal lobule with breast acini show distinct sub-cellular localization of SP21 and CX229. The dual stains of SP21 and CX229 have minimal co-localization (SP21 = red, CX294 = green, co-localization = yellow) but have heterogeneous expression in each acini. Scale bar for all images is 30 $\mu$ m.
